# Supplementary material
Source: PubMed Central journal article supplement (PMC6209119)
Supplement: NIHMS1506067-supplement-1.pdf [file NIHMS1506067-supplement-1.pdf]

# Online Supplement

## The Macrophage and Cardiac Disease

**Part 4 of a 4-part review series: The Macrophage in Cardiovascular Disease**

Kory J. Lavine, MD, PhD, \* Alexander R. Pinto, PhD, \* Slava Epelman, MD, PhD, \*

Benjamin J Kopecky, MD, PhD, \* Xavier Clemente-Casares, PhD, \* James Godwin, PhD, \*

Nadia Rosenthal, PhD, \* Jason C Kovacic, MD, PhD, FACC.<sup>1</sup>

\*Co-First Authorship

**Online Table 1. Perturbation of monocytes/macrophages in experimental models of cardiac injury and key results/findings.**

| Reference                | Experimental model/study details                                                                                        | Key results/findings                                                                                                                                                                                                                 |
|--------------------------|-------------------------------------------------------------------------------------------------------------------------|--------------------------------------------------------------------------------------------------------------------------------------------------------------------------------------------------------------------------------------|
| Nahrendorf et al. (1)    | <ul style="list-style-type: none"> <li>• clodronate liposome (phase 1 or phase 2 after injury)</li> <li>• MI</li> </ul> | <ul style="list-style-type: none"> <li>• reduced macrophages (either phase 1 or 2 depleted)</li> <li>• reduced fibrosis (either phase 1 or 2 depleted)</li> <li>• reduced inflammation</li> <li>• reduced vascularization</li> </ul> |
| Kaikita et al. (2)       | <ul style="list-style-type: none"> <li>• Ccr2<sup>-/-</sup></li> <li>• MI</li> </ul>                                    | <ul style="list-style-type: none"> <li>• reduced macrophages</li> <li>• improved cardiac function</li> <li>• reduced proteolytic activity</li> <li>• reduced inflammation</li> </ul>                                                 |
| Hayashidani et al. (3)   | <ul style="list-style-type: none"> <li>• anti-Ccl2 gene therapy</li> <li>• MI</li> </ul>                                | <ul style="list-style-type: none"> <li>• increased survival</li> <li>• reduced macrophages</li> <li>• improved cardiac function</li> <li>• reduced fibrosis</li> <li>• reduced inflammation</li> </ul>                               |
| Dewald et al. (4)        | <ul style="list-style-type: none"> <li>• Ccl2<sup>-/-</sup></li> <li>• MI</li> </ul>                                    | <ul style="list-style-type: none"> <li>• reduced macrophages</li> <li>• reduced fibrosis</li> <li>• reduced vascularization</li> <li>• altered inflammation</li> <li>• improved cardiac function</li> </ul>                          |
| Hilgendorf et al. (5)    | <ul style="list-style-type: none"> <li>• Nr4a1<sup>-/-</sup></li> <li>• MI</li> </ul>                                   | <ul style="list-style-type: none"> <li>• reduced fibrosis</li> <li>• larger scar</li> <li>• reduced cardiac function</li> <li>• increased inflammation</li> </ul>                                                                    |
| Leuschner et al. (6)     | <ul style="list-style-type: none"> <li>• Splenectomy</li> <li>• MI</li> </ul>                                           | <ul style="list-style-type: none"> <li>• reduced cardiac function</li> <li>• smaller scar</li> <li>• reduced fibrosis</li> <li>• reduced macrophages</li> </ul>                                                                      |
| Gao et al. (7)           | <ul style="list-style-type: none"> <li>• MIF<sup>-/-</sup></li> <li>• I/R MI</li> </ul>                                 | <ul style="list-style-type: none"> <li>• reduced inflammation</li> <li>• reduced macrophages</li> <li>• reduced myocyte apoptosis</li> <li>• reduced infarct size</li> </ul>                                                         |
| van Amerongen et al. (8) | <ul style="list-style-type: none"> <li>• clodronate liposome</li> <li>• cryoinjury</li> </ul>                           | <ul style="list-style-type: none"> <li>• reduced survival</li> <li>• reduced vascularization</li> <li>• larger scar</li> <li>• reduced fibrosis</li> </ul>                                                                           |
| Frantz et al. (9)        | <ul style="list-style-type: none"> <li>• clodronate liposome</li> </ul>                                                 | <ul style="list-style-type: none"> <li>• reduced survival</li> <li>• increase LV thromboembolic events</li> <li>• reduced fibrosis</li> <li>• increased inflammation</li> </ul>                                                      |
| Zhao et al. (10)         | <ul style="list-style-type: none"> <li>• Cxcr6<sup>-/-</sup></li> <li>• I/R MI</li> </ul>                               | <ul style="list-style-type: none"> <li>• improved cardiac function</li> <li>• reduced infarct size</li> </ul>                                                                                                                        |

|                       |                                                                                                                           |                                                                                                                                                                                      |
|-----------------------|---------------------------------------------------------------------------------------------------------------------------|--------------------------------------------------------------------------------------------------------------------------------------------------------------------------------------|
| DeBerge et al. (11)   | <ul style="list-style-type: none"> <li>• MerTK<sup>-/-</sup></li> <li>• I/R MI</li> </ul>                                 | <ul style="list-style-type: none"> <li>• increased infarct size</li> <li>• increased inflammation</li> <li>• reduced cardiac function</li> </ul>                                     |
| Meyer et al. (12)     | <ul style="list-style-type: none"> <li>• Wif1<sup>-/-</sup></li> <li>• MI</li> </ul>                                      | <ul style="list-style-type: none"> <li>• larger scar</li> <li>• reduced cardiac function</li> <li>• reduced macrophages</li> </ul>                                                   |
| Howangyin et al. (13) | <ul style="list-style-type: none"> <li>• Mertk<sup>-/-</sup>Mfge8<sup>-/-</sup></li> <li>• MI</li> </ul>                  | <ul style="list-style-type: none"> <li>• reduced cardiac function</li> <li>• reduced fibrosis</li> </ul>                                                                             |
| Leblond et al. (14)   | <ul style="list-style-type: none"> <li>• GW2580 treatment</li> <li>• MI</li> </ul>                                        | <ul style="list-style-type: none"> <li>• increased inflammation</li> <li>• reduced cardiac function</li> </ul>                                                                       |
| Lorchner et al. (15)  | <ul style="list-style-type: none"> <li>• Oxmr<sup>-/-</sup> and Reg3b<sup>-/-</sup></li> <li>• MI</li> </ul>              | <ul style="list-style-type: none"> <li>• reduced macrophages</li> <li>• reduced survival</li> <li>• reduced fibrosis</li> </ul>                                                      |
| Hayasaki et al. (16)  | <ul style="list-style-type: none"> <li>• Ccr2<sup>-/-</sup></li> <li>• I/R MI</li> </ul>                                  | <ul style="list-style-type: none"> <li>• reduced infarct size</li> <li>• reduced macrophages</li> <li>• reduced fibrosis</li> </ul>                                                  |
| Leuschner et al. (17) | <ul style="list-style-type: none"> <li>• Ccr2-siRNA nano-particles</li> <li>• I/R MI</li> </ul>                           | <ul style="list-style-type: none"> <li>• reduced infarct size</li> <li>• reduced macrophages</li> </ul>                                                                              |
| Majmudar et al. (18)  | <ul style="list-style-type: none"> <li>• Ccr2-siRNA nano-particles</li> <li>• ApoE<sup>-/-</sup></li> <li>• MI</li> </ul> | <ul style="list-style-type: none"> <li>• reduced macrophages</li> <li>• reduced inflammation</li> <li>• improved cardiac function</li> </ul>                                         |
| Liehn et al. (19)     | <ul style="list-style-type: none"> <li>• Ccl2 competitor treatment</li> <li>• I/R MI</li> </ul>                           | <ul style="list-style-type: none"> <li>• improved cardiac function</li> <li>• reduced fibrosis</li> <li>• reduced macrophages</li> </ul>                                             |
| He et al. (20)        | <ul style="list-style-type: none"> <li>• Lp-PLA2 BM chimeras</li> <li>• MI</li> </ul>                                     | <ul style="list-style-type: none"> <li>• improved cardiac function</li> <li>• reduced inflammation</li> <li>• reduced fibrosis</li> <li>• increased vascularization</li> </ul>       |
| Panizzi et al. (21)   | <ul style="list-style-type: none"> <li>• ApoE<sup>-/-</sup></li> <li>• MI</li> </ul>                                      | <ul style="list-style-type: none"> <li>• increased macrophages</li> <li>• increased inflammation</li> <li>• increased vascularization</li> <li>• reduced cardiac function</li> </ul> |

## Supplemental References

1. Nahrendorf M, Swirski FK, Aikawa E et al. The healing myocardium sequentially mobilizes two monocyte subsets with divergent and complementary functions. *J Exp Med* 2007;204:3037-47.
2. Kaikita K, Hayasaki T, Okuma T, Kuziel WA, Ogawa H, Takeya M. Targeted deletion of CC chemokine receptor 2 attenuates left ventricular remodeling after experimental myocardial infarction. *Am J Pathol* 2004;165:439-47.
3. Hayashidani S, Tsutsui H, Shiomi T et al. Anti-monocyte chemoattractant protein-1 gene therapy attenuates left ventricular remodeling and failure after experimental myocardial infarction. *Circulation* 2003;108:2134-40.
4. Dewald O, Zymek P, Winkelmann K et al. CCL2/Monocyte Chemoattractant Protein-1 regulates inflammatory responses critical to healing myocardial infarcts. *Circ Res* 2005;96:881-9.
5. Hilgendorf I, Gerhardt LM, Tan TC et al. Ly-6Chigh monocytes depend on Nr4a1 to balance both inflammatory and reparative phases in the infarcted myocardium. *Circ Res* 2014;114:1611-22.
6. Leuschner F, Rauch PJ, Ueno T et al. Rapid monocyte kinetics in acute myocardial infarction are sustained by extramedullary monocytopoiesis. *J Exp Med* 2012;209:123-37.
7. Gao XM, Liu Y, White D et al. Deletion of macrophage migration inhibitory factor protects the heart from severe ischemia-reperfusion injury: a predominant role of anti-inflammation. *J Mol Cell Cardiol* 2011;50:991-9.

8. van Amerongen MJ, Harmsen MC, van Rooijen N, Petersen AH, van Luyn MJ. Macrophage depletion impairs wound healing and increases left ventricular remodeling after myocardial injury in mice. *Am J Pathol* 2007;170:818-29.
9. Frantz S, Hofmann U, Fraccarollo D et al. Monocytes/macrophages prevent healing defects and left ventricular thrombus formation after myocardial infarction. *FASEB J* 2013;27:871-81.
10. Zhao G, Wang S, Wang Z et al. CXCR6 deficiency ameliorated myocardial ischemia/reperfusion injury by inhibiting infiltration of monocytes and IFN-gamma-dependent autophagy. *Int J Cardiol* 2013;168:853-62.
11. DeBerge M, Yeap XY, Dehn S et al. MerTK Cleavage on Resident Cardiac Macrophages Compromises Repair After Myocardial Ischemia Reperfusion Injury. *Circ Res* 2017;121:930-940.
12. Meyer IS, Jungmann A, Dieterich C et al. The cardiac microenvironment uses non-canonical WNT signaling to activate monocytes after myocardial infarction. *EMBO Mol Med* 2017;9:1279-1293.
13. Howangyin KY, Zlatanova I, Pinto C et al. Myeloid-Epithelial-Reproductive Receptor Tyrosine Kinase and Milk Fat Globule Epidermal Growth Factor 8 Coordinately Improve Remodeling After Myocardial Infarction via Local Delivery of Vascular Endothelial Growth Factor. *Circulation* 2016;133:826-39.
14. Leblond AL, Klinkert K, Martin K et al. Systemic and Cardiac Depletion of M2 Macrophage through CSF-1R Signaling Inhibition Alters Cardiac Function Post Myocardial Infarction. *PLoS One* 2015;10:e0137515.

15. Lorchner H, Poling J, Gajawada P et al. Myocardial healing requires Reg3beta-dependent accumulation of macrophages in the ischemic heart. *Nat Med* 2015;21:353-62.
16. Hayasaki T, Kaikita K, Okuma T et al. CC chemokine receptor-2 deficiency attenuates oxidative stress and infarct size caused by myocardial ischemia-reperfusion in mice. *Circ J* 2006;70:342-51.
17. Leuschner F, Dutta P, Gorbатов R et al. Therapeutic siRNA silencing in inflammatory monocytes in mice. *Nat Biotechnol* 2011;29:1005-10.
18. Majmudar MD, Keliher EJ, Heidt T et al. Monocyte-directed RNAi targeting CCR2 improves infarct healing in atherosclerosis-prone mice. *Circulation* 2013;127:2038-46.
19. Liehn EA, Piccinini AM, Koenen RR et al. A new monocyte chemotactic protein-1/chemokine CC motif ligand-2 competitor limiting neointima formation and myocardial ischemia/reperfusion injury in mice. *J Am Coll Cardiol* 2010;56:1847-57.
20. He S, Chousterman BG, Fenn A et al. Lp-PLA2 Antagonizes Left Ventricular Healing After Myocardial Infarction by Impairing the Appearance of Reparative Macrophages. *Circ Heart Fail* 2015;8:980-7.
21. Panizzi P, Swirski FK, Figueiredo JL et al. Impaired infarct healing in atherosclerotic mice with Ly-6C(hi) monocytosis. *J Am Coll Cardiol* 2010;55:1629-38.
